# Supplementary material for: Enhanced transfer of organic matter to higher trophic levels caused by ocean acidification and its implications for export production: A mass balance approach
Source: PLOS journal article supplement (doi:10.1371/journal.pone.0197502), 2018-05-25
Supplement: S3 (10.1371/journal.pone.0197502.s003) [file journal.pone.0197502.s003]

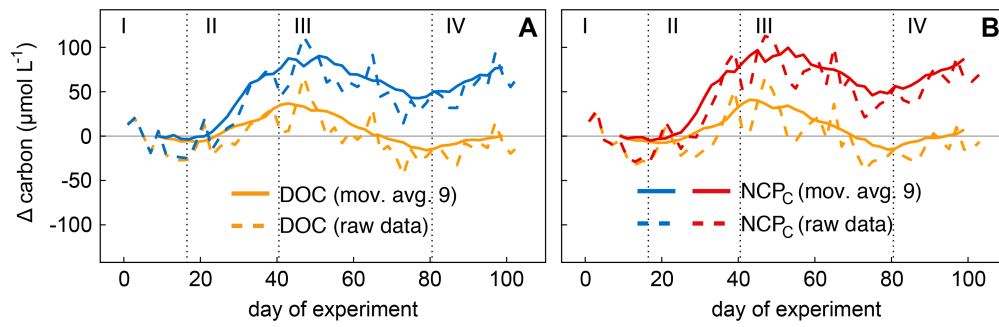

**S3 Fig. Moving average of dissolved organic carbon and net community production.**

Dashed lines show net changes of dissolved organic carbon (DOC, yellow) and net community production of carbon (NCP, blue/red) as average values of (A) ambient and (B) high CO<sub>2</sub> mesocosms. Solid lines of the same colour code show strongly smoothed data (moving average of nine), with an adjusted reference period for calculation of net changes to  $t_1 - t_{17}$ . Accordingly, smoothed data sets do not start before day 9. Roman numbers denote the different phases of the experiment.
